# Supplementary material for: Co-emergence of magnetic order and structural fluctuations in magnetite
Source: PubMed Central journal article supplement (PMC6599026; doi:10.1038/s41467-019-10949-9), 2019-06-28
Supplement: 41467_2019_10949_MOESM1_ESM.pdf [file 41467_2019_10949_MOESM1_ESM.pdf]

## **Supplementary Information**

### **Co-emergence of magnetic order and structural fluctuations in magnetite**

Perversi et al

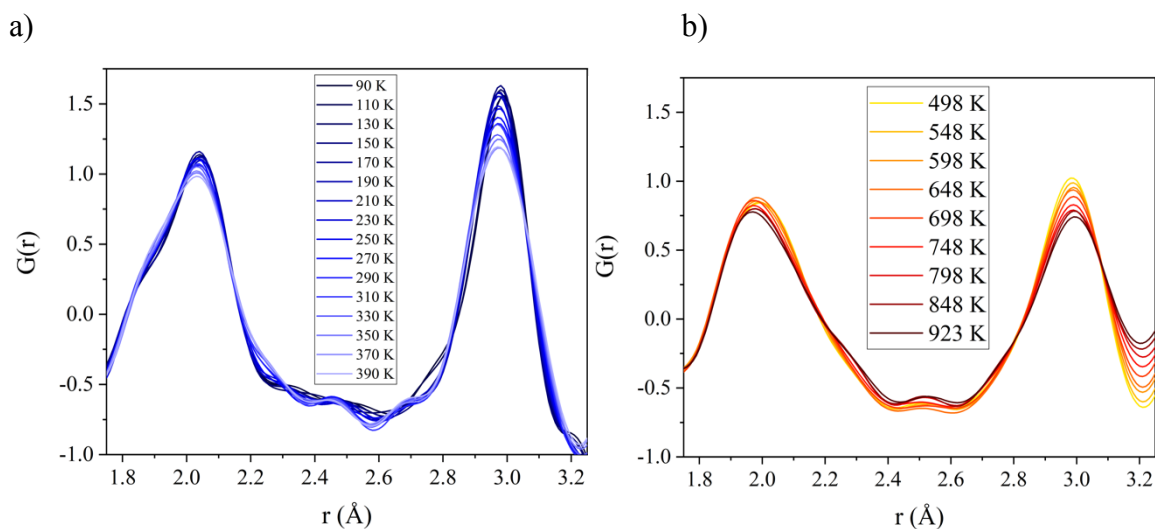

**Supplementary Figure 1** – Temperature evolution of the PDFs, displayed in the region of the first and second coordination shells (Fe-O at  $r \approx 2.0$  Å and Fe-Fe at  $r \approx 3.0$  Å). Small termination error differences between datasets collected using (a) nitrogen and (b) hot-air blower sample environments are apparent in the  $r \approx 2.2 - 2.8$  Å region.

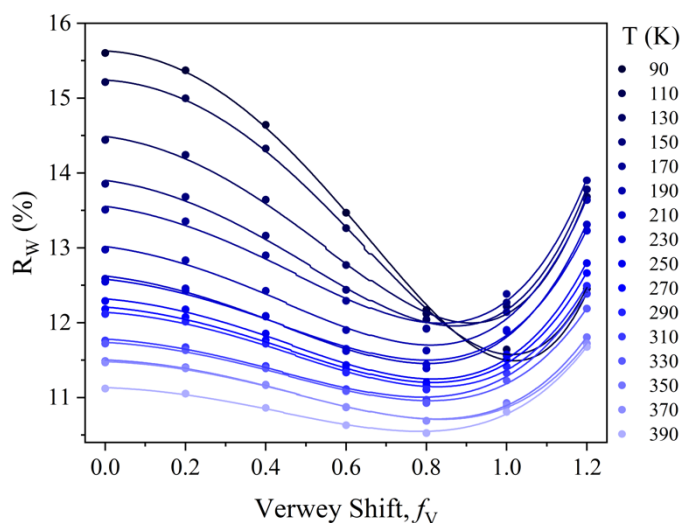

**Supplementary Figure 2** – Residual  $R_w$  for the First Unit Cell PDF fits plotted as a function of Verwey shift  $f_v$ , at 90-300 K. Temperatures are colour coded as indicated by the legend. The discontinuity between 110 and 130 K curves reflects the change from long range to local structural distortions on passing through the Verwey transition at 123 K. The corresponding plot for high temperature fits is in Fig. 2b. The fitting function is Equation (1) in Methods.

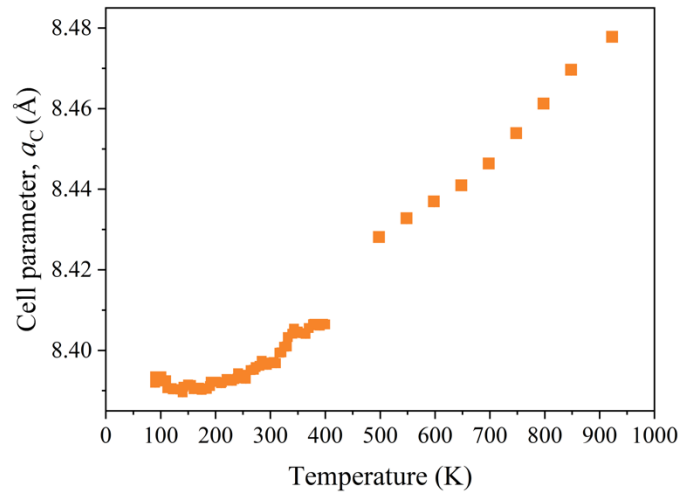

**Supplementary Figure 3** – Plot of the cubic lattice parameter fitted to integrated diffraction patterns by Rietveld refinement using the FullProf suite.<sup>1</sup> A cubic spinel model was fitted at all temperatures as it was not possible to refine the monoclinic model below  $T_V$ .

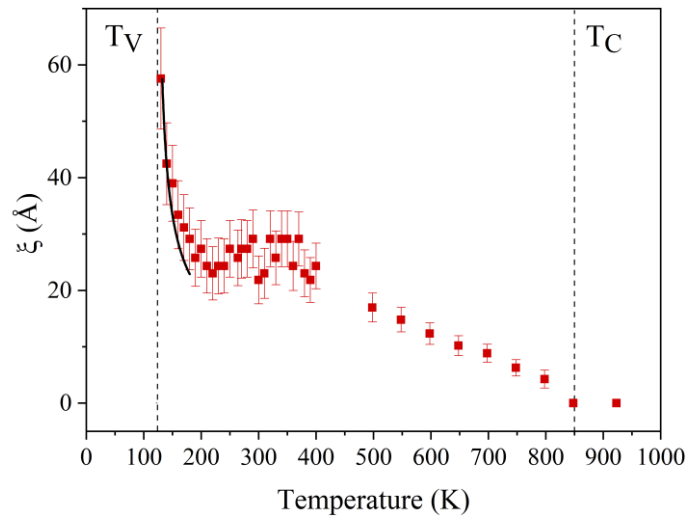

**Supplementary Figure 4** – Temperature evolution of an effective correlation length  $\xi$  for the local structural distortions in magnetite, derived from the First Unit Cell  $f_V$  values through the relation  $f_V = e^{-r_1/\xi}$  where  $r_1 = 5.43 \text{ \AA}$  is the average interatomic distance in the First Unit Cell range. A critical fit  $\xi \sim (T - T_V)^{-\nu}$  is shown for exponent  $\nu = 0.5$  in a mean field model. The experimental values deviate above this limit due to the magnetically induced structural correlations that persist up to  $T_C$ . Error bars are derived from estimated standard deviations in the refinements.

**Supplementary Table 1.** Atomic coordinates  $p_u$  for the reference undistorted magnetite structure corresponding to Verwey shift  $f_V = 0$ . The space group is monoclinic  $Cc$  and lattice parameters  $a = b = \sqrt{2}a_c$ ,  $c = 2a_c$ ,  $\alpha = \beta = \gamma = 90^\circ$  are metrically constrained by cubic spinel cell parameter  $a_c \approx 8.4 \text{ \AA}$ . Coordinates and their estimated standard deviations shown in parentheses are transformed from a refined model of the cubic structure at 130 K as described in Methods. Atom labels are for tetrahedral  $\text{Fe}_A$ , octahedral  $\text{Fe}_B$ , and O sites. All sites are fully occupied.

| Atom | x          | y          | z           |
|------|------------|------------|-------------|
| A11  | 0.627      | 0          | 0.8135      |
| A12  | 0.127      | 0          | 0.8135      |
| A13  | 0.877      | 0.25       | 0.0635      |
| A14  | 0.877      | 0.25       | 0.5635      |
| A21  | 0.377      | 0          | 0.6885      |
| A22  | 0.877      | 0          | 0.6885      |
| A23  | 0.627      | 0.25       | 0.9385      |
| A24  | 0.627      | 0.25       | 0.4385      |
| B1A1 | 0.002      | 0          | 0.001       |
| B1A2 | 0.502      | 0          | 0.001       |
| B1B1 | 0.252      | 0.25       | 0.251       |
| B1B2 | 0.252      | 0.25       | 0.751       |
| B2A1 | 0.127      | 0.125      | 0.626       |
| B2A2 | 0.127      | 0.125      | 0.126       |
| B2B1 | 0.627      | 0.125      | 0.626       |
| B2B2 | 0.627      | 0.125      | 0.126       |
| B31  | 0.377      | 0.375      | 0.876       |
| B32  | 0.377      | 0.375      | 0.376       |
| B33  | 0.877      | 0.375      | 0.876       |
| B34  | 0.877      | 0.375      | 0.376       |
| B41  | 0.252      | 0          | 0.001       |
| B42  | 0.752      | 0          | 0.001       |
| B43  | 0.502      | 0.25       | 0.251       |
| B44  | 0.502      | 0.25       | 0.751       |
| O11  | 0.75690(3) | 0.00000(3) | 0.87845(15) |
| O12  | 0.25690(3) | 0.00000(3) | 0.87845(15) |
| O13  | 0.00690(3) | 0.25000(3) | 0.12845(15) |
| O14  | 0.00690(3) | 0.25000(3) | 0.62845(15) |
| O21  | 0.12700(3) | 0.37010(3) | 0.74855(15) |
| O22  | 0.12700(3) | 0.37010(3) | 0.24855(15) |
| O23  | 0.62700(3) | 0.37010(3) | 0.74855(15) |
| O24  | 0.62700(3) | 0.37010(3) | 0.24855(15) |
| O31  | 0.87700(3) | 0.12010(3) | 0.99855(15) |
| O32  | 0.87700(3) | 0.12010(3) | 0.49855(15) |
| O33  | 0.37700(3) | 0.12010(3) | 0.99855(15) |
| O34  | 0.37700(3) | 0.12010(3) | 0.49855(15) |
| O41  | 0.49710(3) | 0.00000(3) | 0.87845(15) |
| O42  | 0.99710(3) | 0.00000(3) | 0.87845(15) |
| O43  | 0.74710(3) | 0.25000(3) | 0.12845(15) |
| O44  | 0.74710(3) | 0.25000(3) | 0.62845(15) |
| O5A1 | 0.24710(3) | 0.00000(3) | 0.62355(15) |
| O5A2 | 0.74710(3) | 0.00000(3) | 0.62355(15) |
| O5A3 | 0.49710(3) | 0.25000(3) | 0.87355(15) |
| O5A4 | 0.49710(3) | 0.25000(3) | 0.37355(15) |
| O5B1 | 0.62700(3) | 0.37990(3) | 0.00345(15) |
| O5B2 | 0.62700(3) | 0.37990(3) | 0.50345(15) |
| O5B3 | 0.12700(3) | 0.37990(3) | 0.00345(15) |
| O5B4 | 0.12700(3) | 0.37990(3) | 0.50345(15) |
| O6A1 | 0.37700(3) | 0.12990(3) | 0.25345(15) |
| O6A2 | 0.37700(3) | 0.12990(3) | 0.75345(15) |
| O6A3 | 0.87700(3) | 0.12990(3) | 0.25345(15) |
| O6A4 | 0.87700(3) | 0.12990(3) | 0.75345(15) |
| O6B1 | 0.00690(3) | 0.00000(3) | 0.62355(15) |
| O6B2 | 0.50690(3) | 0.00000(3) | 0.62355(15) |
| O6B3 | 0.25690(3) | 0.25000(3) | 0.87355(15) |
| O6B4 | 0.25690(3) | 0.25000(3) | 0.37355(15) |

**Supplementary Table 2.** Atomic coordinates  $p_d$  for the reference fully distorted magnetite structure corresponding to Verwey shift  $f_V = 1$ . The space group is monoclinic  $Cc$  and lattice parameters  $a = b = \sqrt{2}a_c$ ,  $c = 2a_c$ ,  $\alpha = \beta = \gamma = 90^\circ$  are metrically constrained by cubic spinel cell parameter  $a_c \approx 8.4$  Å. Coordinates and their estimated standard deviations shown in parentheses are transformed from a refined model of the monoclinic structure at 90 K as described in Methods. Atom labels are for tetrahedral Fe<sub>A</sub>, octahedral Fe<sub>B</sub>, and O sites. All sites are fully occupied.

| Atom | x           | y            | z            |
|------|-------------|--------------|--------------|
| A11  | 0.62943(2)  | 0.00502(2)   | 0.81268(13)  |
| A12  | 0.12546(2)  | 0.00162(2)   | 0.81099(13)  |
| A13  | 0.87529(2)  | 0.24867(2)   | 0.06528(13)  |
| A14  | 0.87834(2)  | 0.25204(2)   | 0.56495(13)  |
| A21  | 0.37481(18) | 0.00477(2)   | 0.69019(11)  |
| A22  | 0.88092(18) | 0.00074(2)   | 0.68841(11)  |
| A23  | 0.62680(19) | 0.25398(2)   | 0.93773(10)  |
| A24  | 0.62495(18) | 0.24724(19)  | 0.43778(11)  |
| B1A1 | -0.00237(3) | 0.00076(3)   | -0.00317(14) |
| B1A2 | 0.50207(3)  | 0.00050(3)   | 0.00160(14)  |
| B1B1 | 0.25949(3)  | 0.24780(3)   | 0.25357(15)  |
| B1B2 | 0.24778(2)  | 0.25639(2)   | 0.75250(13)  |
| B2A1 | 0.12586(2)  | 0.12776(15)  | 0.62574(14)  |
| B2A2 | 0.12898(2)  | 0.12538(16)  | 0.12301(13)  |
| B2B1 | 0.62808(3)  | 0.12601(10)  | 0.62642(18)  |
| B2B2 | 0.62683(3)  | 0.11338(10)  | 0.12168(17)  |
| B31  | 0.37714(2)  | 0.37945(17)  | 0.87971(13)  |
| B32  | 0.37563(2)  | 0.36913(16)  | 0.37427(13)  |
| B33  | 0.87664(2)  | 0.38747(15)  | 0.88065(12)  |
| B34  | 0.87619(2)  | 0.37518(18)  | 0.37661(13)  |
| B41  | 0.25136(2)  | 0.00135(2)   | 0.00100(14)  |
| B42  | 0.75077(2)  | 0.00212(2)   | 0.00217(15)  |
| B43  | 0.50275(2)  | 0.24372(2)   | 0.25178(15)  |
| B44  | 0.50234(3)  | 0.25412(3)   | 0.75181(16)  |
| O11  | 0.75982(12) | 0.00477(12)  | 0.87660(8)   |
| O12  | 0.25259(12) | 0.00327(11)  | 0.87642(8)   |
| O13  | 0.00537(13) | 0.24490(11)  | 0.13070(8)   |
| O14  | 0.01026(13) | 0.25207(12)  | 0.62899(8)   |
| O21  | 0.12962(13) | 0.37691(12)  | 0.74564(8)   |
| O22  | 0.12728(13) | 0.36320(13)  | 0.24915(9)   |
| O23  | 0.62512(12) | 0.36980(11)  | 0.74557(8)   |
| O24  | 0.62958(13) | 0.36784(11)  | 0.24671(8)   |
| O31  | 0.87601(12) | 0.11957(10)  | 1.00004(8)   |
| O32  | 0.87718(13) | 0.12378(11)  | 0.49993(8)   |
| O33  | 0.37627(12) | 0.11928(11)  | 0.99826(7)   |
| O34  | 0.37656(12) | 0.12353(10)  | 0.49962(7)   |
| O41  | 0.50088(11) | 0.00176(10)  | 0.87730(8)   |
| O42  | 0.99736(12) | 0.00223(11)  | 0.87619(8)   |
| O43  | 0.74370(13) | 0.24950(11)  | 0.13020(8)   |
| O44  | 0.74874(12) | 0.25644(10)  | 0.63025(7)   |
| O5A1 | 0.24335(12) | 0.00275(11)  | 0.62571(7)   |
| O5A2 | 0.75123(13) | -0.00040(11) | 0.62466(7)   |
| O5A3 | 0.49746(13) | 0.25561(12)  | 0.87114(8)   |
| O5A4 | 0.49505(13) | 0.24641(11)  | 0.37207(8)   |
| O5B1 | 0.62576(12) | 0.38280(11)  | 0.00569(8)   |
| O5B2 | 0.62372(13) | 0.37670(12)  | 0.50330(8)   |
| O5B3 | 0.12711(13) | 0.38186(11)  | 0.00490(7)   |
| O5B4 | 0.12595(12) | 0.37526(11)  | 0.50168(7)   |
| O6A1 | 0.37440(11) | 0.12398(11)  | 0.25502(7)   |
| O6A2 | 0.37752(11) | 0.13749(12)  | 0.75466(7)   |
| O6A3 | 0.87800(11) | 0.13034(13)  | 0.25258(7)   |
| O6A4 | 0.87821(11) | 0.13169(11)  | 0.75170(6)   |
| O6B1 | 0.01119(11) | 0.00229(12)  | 0.62362(7)   |
| O6B2 | 0.50298(11) | 0.00130(13)  | 0.62598(7)   |
| O6B3 | 0.25291(11) | 0.25518(13)  | 0.87214(7)   |
| O6B4 | 0.25606(11) | 0.24263(13)  | 0.37410(7)   |

## Supplementary References

<sup>1</sup> Rodríguez-Carvajal, J., Recent advances in magnetic structure determination by neutron powder diffraction. *Physica B* **192**, 55-69 (1993).
